# Supplementary material for: Mechanical Loading Differentially Affects Osteocytes in Fibulae from Lactating Mice Compared to Osteocytes in Virgin Mice: Possible Role for Lacuna Size
Source: Springer Nature journal article supplement (doi:10.1007/s00223-018-0463-8), 2018-08-13
Supplement: MOESM2 [file 16036490]

**Article title:** MECHANICAL LOADING DIFFERENTIALLY AFFECTS OSTEOCYTES IN FIBULAE FROM LACTATING MICE COMPARED TO OSTEOCYTES IN VIRGIN MICE: POSSIBLE ROLE FOR LACUNA SIZE

**Journal name:** Calcified Tissue International

**Author names:** Haniyeh Hemmatian<sup>1,2</sup>, Rozita Jalali<sup>2</sup>, Cor M. Semeins<sup>2</sup>, Jolanda M.A. Hogervorst<sup>2</sup>, G. Harry van Lenthe<sup>1</sup>, Jenneke Klein-Nulend<sup>2</sup>, Astrid D. Bakker<sup>2</sup>

**Affiliation:**

<sup>1</sup> Biomechanics Section, Department of Mechanical Engineering, KU Leuven, Leuven, Belgium

<sup>2</sup> Department of Oral Cell Biology, Academic Centre for Dentistry Amsterdam (ACTA), University of Amsterdam and Vrije Universiteit Amsterdam, Amsterdam Movement Sciences, Amsterdam, The Netherlands

**Corresponding author:**

Jenneke Klein-Nulend

Email: [j.kleinnulend@acta.nl](mailto:j.kleinnulend@acta.nl)

**Supplementary data**

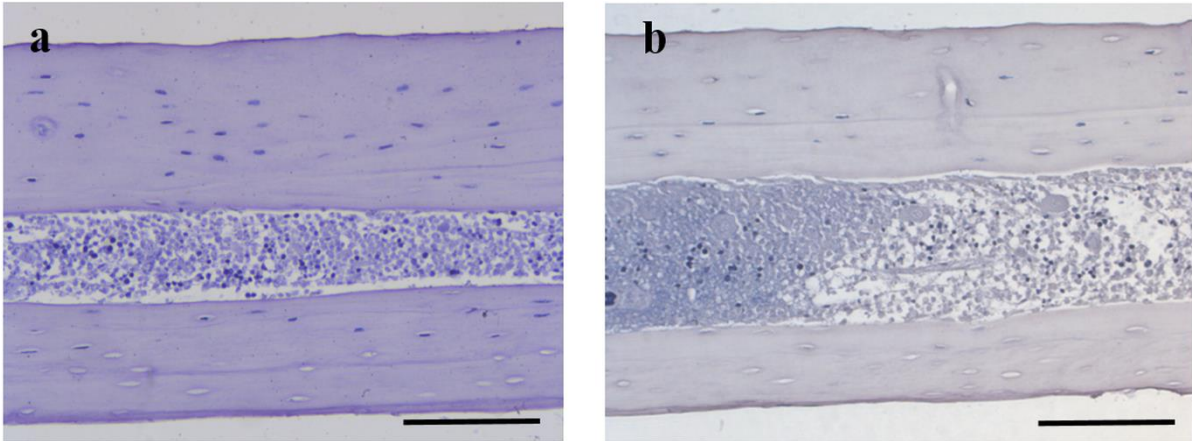

Fig S1. Negative controls for immunohistochemical staining for sclerostin (a) and  $\beta$ -catenin (b).
